# Supplementary material for: Inter-rater reliability between nurses for a new paediatric triage system based primarily on vital parameters: the Paediatric Triage Instrument (PETI)
Source: PubMed Central journal article supplement — BMJ Open. 2017 Feb 23;7(2):e012748. doi: 10.1136/bmjopen-2016-012748 (PMC5337717; doi:10.1136/bmjopen-2016-012748), 2017-02-23
Supplement: bmjopen-2016-012748supp_appendix.pdf [file bmjopen-2016-012748supp_appendix.pdf]

# **Appendix 1**

**Including the PETI-protocol and the reference values of the VPs for use in the PETI**

# THE PETI - PROTOCOL

|                                                                                                                                       |      |                 |        |
|---------------------------------------------------------------------------------------------------------------------------------------|------|-----------------|--------|
| Presenting complaint                                                                                                                  | Date | Time of arrival | Clinic |
| Time to TRIAGE (by reception desk assessment)<br><b>RED</b> = 0 min <b>ORANGE</b> =15 min <b>YELLOW</b> = 30 min <b>GREEN</b> =60 min |      |                 |        |
| Notes                                                                                                                                 |      |                 |        |

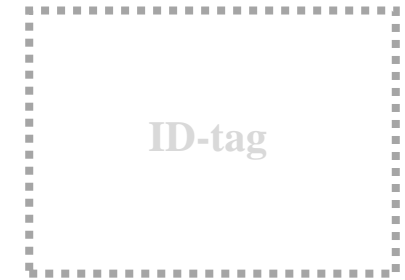

| TRIAGE   |                  |           | 4 points<br>EMERGENT                  | 2 points<br>VERY URGENT                            | 1 point<br>URGENT     | 0 points<br>NON-URGENT  | POINTS |
|----------|------------------|-----------|---------------------------------------|----------------------------------------------------|-----------------------|-------------------------|--------|
| <b>A</b> |                  | <b>VS</b> | <b>Airway obstruction<br/>Stridor</b> | <b>Airway<br/>compromised<br/>Severe recession</b> | <b>Mild recession</b> | <b>Normal breathing</b> |        |
| <b>B</b> | SpO <sub>2</sub> | %         | Spo <sub>2</sub>                      | SaO <sub>2</sub>                                   | SaO <sub>2</sub>      | SaO <sub>2</sub>        |        |
|          | RR               | /min      | RR                                    | RR                                                 | RR                    | RR                      |        |
| <b>C</b> | HR               | /min      | HR                                    | HR                                                 | HR                    | HR                      |        |
|          | CRT              | s         | CRT                                   | CRT                                                | CRT                   | CRT                     |        |
| <b>D</b> | AVPU             |           | <b>U/P<br/>Convulsions</b>            | <b>V<br/>Sloppy infant or<br/>irritable infant</b> |                       | <b>A</b>                |        |
| <b>E</b> | Temp             | °C        | Temp                                  | Temp                                               | Temp                  | Temp                    |        |

|                      |                         |                   |                        |   |   |
|----------------------|-------------------------|-------------------|------------------------|---|---|
| <b>EMERGENT</b> ≥10p | <b>VERY URGENT</b> 6-9p | <b>URGENT</b> 2-5 | <b>NON-URGENT</b> 0-1p | = | p |
|----------------------|-------------------------|-------------------|------------------------|---|---|

|                                       |                                     |
|---------------------------------------|-------------------------------------|
| Reason for overruling triage decision | Notes i.e. weight, given medication |
|---------------------------------------|-------------------------------------|

## THE REFERENCE VALUES OF THE VITAL PARAMETERS (VPs) FOR USE IN THE PETI

|                   |                            | 4 points<br><b>EMERGENT</b>           | 2 points<br><b>VERY URGENT</b>                            | 1 point<br><b>URGENT</b> | 0 points<br><b>NON-URGENT</b> |
|-------------------|----------------------------|---------------------------------------|-----------------------------------------------------------|--------------------------|-------------------------------|
| <b>A</b>          |                            | <b>Airway obstruction<br/>Stridor</b> | <b>Airway compromised<br/>Severe recession</b>            | <b>Mild recession</b>    | <b>Normal breathing</b>       |
| <b>B</b>          | SpO2 %                     | ≤90                                   | ≥91                                                       | ≥93                      | ≥95                           |
| RR                | <1years                    | >60 or ≤15                            | 50-60                                                     | 40-50                    | 30-40                         |
| RR                | 1-2years                   | >45 or ≤12                            | 40-45                                                     | 35-40                    | 25-35                         |
| RR                | 3-4years                   | >40 or ≤12                            | 35-40                                                     | 30-35                    | 25-30                         |
| RR                | 5-12 years                 | >35 or ≤8                             | 30-35                                                     | 25-30                    | 20-25                         |
| RR                | >12years                   | >30 or ≤8                             | 25-30                                                     | 20-25                    | 15-20                         |
| <b>CRT</b>        |                            | ≥4 seconds                            | 3 seconds                                                 | 2 seconds                | 1 second                      |
| HR                | <1years                    | >180 or ≤70                           | 170-180                                                   | 160-170                  | 110-160                       |
| HR                | 1-2years                   | >170 or ≤60                           | 160-170                                                   | 150-160                  | 100-150                       |
| HR                | 3-4years                   | >160 or ≤60                           | 150-160                                                   | 140-150                  | 95-140                        |
| HR                | 5-12years                  | >140 or ≤50                           | 130-140                                                   | 120-130                  | 80-120                        |
| HR                | >12years                   | >130 or ≤40                           | 110-130 or ≤50                                            | 100-110                  | 60-100                        |
| <b>Disability</b> |                            | <b>U/P (of AVPU)</b>                  | <b>V (of AVPU)<br/>Sloppy infant/Irritable<br/>infant</b> |                          | <b>A (of AVPU)</b>            |
| <b>E</b>          | temperature C°<br>≤3months | ≥39 or ≤35                            | ←                                                         | ≥38                      | 36,5-37,9                     |
|                   | ≤3 years                   | ≤35                                   | ≥39                                                       | ≥38                      | 36,5-37,9                     |
|                   | >3 years                   | ≤35                                   | ≥41                                                       | ≥38                      | 36,5-37,9                     |
